# Supplementary material for: Isomeric chain structures of {[Mn(H2O)4]2Ru2(CO3)4Br2}nn−: syntheses, structural diversity and magnetic properties
Source: Royal Society of Chemistry journal article supplement (doi:10.1039/c4dt01522c), 2014-01-01
Supplement: c4dt01522c1.pdf [file c4dt01522c1.pdf]

## Electronic Supporting Information (ESI)

### Isomeric Chain Structures of $\{[\text{Mn}(\text{H}_2\text{O})_4]_2\text{Ru}_2(\text{CO}_3)_4\text{Br}_2\}_n^{n-}$ :

#### Syntheses, Structural Diversity and Magnetic Properties

Xiao-Feng Hou,<sup>a</sup> Yan-Yan Jia,<sup>a</sup> Jian-Hui Yang,<sup>a</sup> Zhi Cao,<sup>b\*</sup> Bin Liu,<sup>a\*</sup>

<sup>a</sup>Key Laboratory of Synthetic and Natural Functional Molecule Chemistry of Ministry of Education, College of Chemistry & Materials Science, Shaanxi Key Laboratory of Physico-Inorganic Chemistry, Northwest University, Xi'an 710069, P. R. China

<sup>b</sup>Department of Chemistry, University of California, Berkeley, California 94720, United States.

**Table S1.** Selected bond angles (°) of complexes **1** and **2**

| <b>1</b>           |           |                    |           |
|--------------------|-----------|--------------------|-----------|
| Ru(1A)–Ru(1)–Br(1) | 178.40(5) | O(3)–Mn(1)–O(5)    | 167.2(2)  |
| Ru(1A)–Ru(1)–O(1)  | 90.01(14) | O(3)–Mn(1)–O(5D)   | 89.2(2)   |
| Ru(1A)–Ru(1)–O(2A) | 89.19(14) | O(4)–Mn(1)–O(5)    | 92.7(2)   |
| O(3)–Mn(1)–O(3D)   | 91.3(2)   | O(4)–Mn(1)–O(5D)   | 77.4(2)   |
| O(3)–Mn(1)–O(4)    | 100.0(2)  | O(5)–Mn(1)–O(5D)   | 93.1(3)   |
| O(3)–Mn(1)–O(4D)   | 90.0(2)   | Mn(1)–O(3)–C(1)    | 129.7(5)  |
| <b>2</b>           |           |                    |           |
| Ru(1A)–Ru(1)–Br(1) | 177.75(5) | Ru(2B)–Ru(2)–Br(2) | 176.65(6) |
| Ru(1A)–Ru(1)–O(1)  | 89.03(16) | Ru(2B)–Ru(2)–O(4)  | 89.44(12) |
| Ru(1A)–Ru(1)–O(3)  | 90.06(16) | Ru(2B)–Ru(2)–O(6)  | 89.79(12) |
| O(2)–Mn(1)–O(5)    | 88.9(2)   | O(5)–Mn(1)–O(10)   | 91.5(2)   |
| O(2)–Mn(1)–O(7)    | 89.6(2)   | O(7)–Mn(1)–O(8)    | 88.3(2)   |
| O(2)–Mn(1)–O(8)    | 91.6(2)   | O(7)–Mn(1)–O(9)    | 88.3(2)   |
| O(2)–Mn(1)–O(9)    | 94.3(2)   | O(7)–Mn(1)–O(10)   | 90.1(3)   |
| O(5)–Mn(1)–O(8)    | 94.32(19) | O(8)–Mn(1)–O(10)   | 86.7(2)   |
| O(5)–Mn(1)–O(9)    | 89.29(19) | O(9)–Mn(1)–O(10)   | 87.4(3)   |
| Mn(1)–O(2)–C(1)    | 131.2(5)  | Mn(1)–O(5)–C(2)    | 128.8(4)  |

Symmetry codes: **1:** A,  $-x + 1, -y + 2, z$ ; B,  $-x + 1, -y + 2, -z$ ; C,  $x, y, -z$ ; D,  $-y + 3/2, -x + 3/2, -z + 1/2$ . **2:** A,  $1-x, y, 2-z$ ; B,  $-x, y, 1-z$ ; C,  $x, -y, z$ .

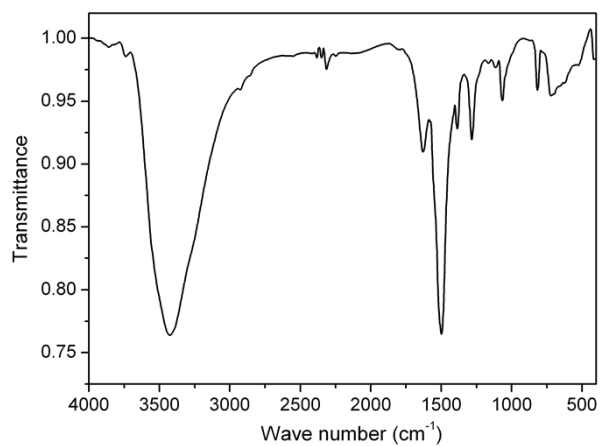

**Fig S1.** IR spectra of complex 1.

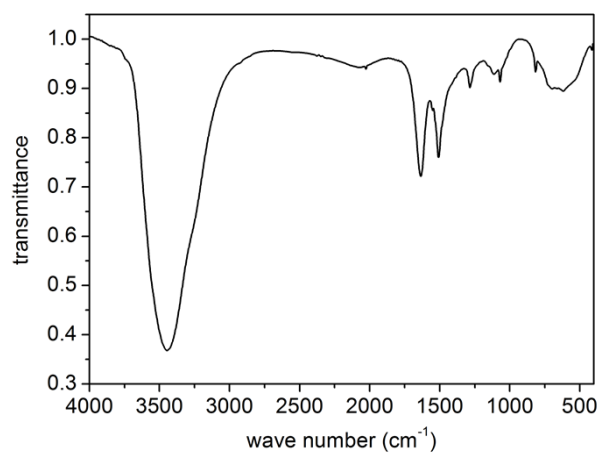

**Fig S2.** IR spectra of complex 2.

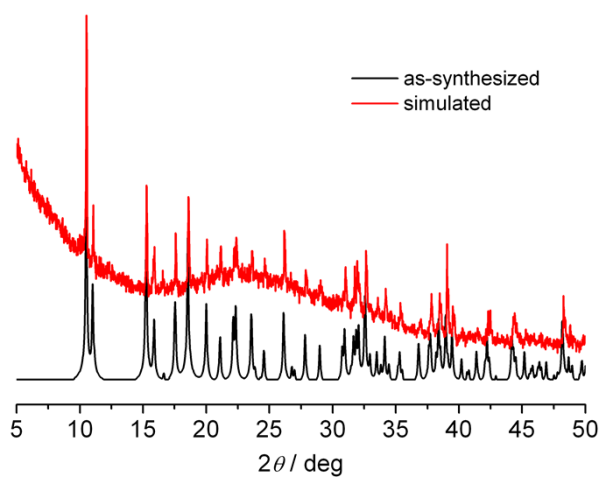

**Fig S3.** Comparison of XRPD patterns of the simulated pattern from the single-crystal structure determination and as-synthesized product of 1.

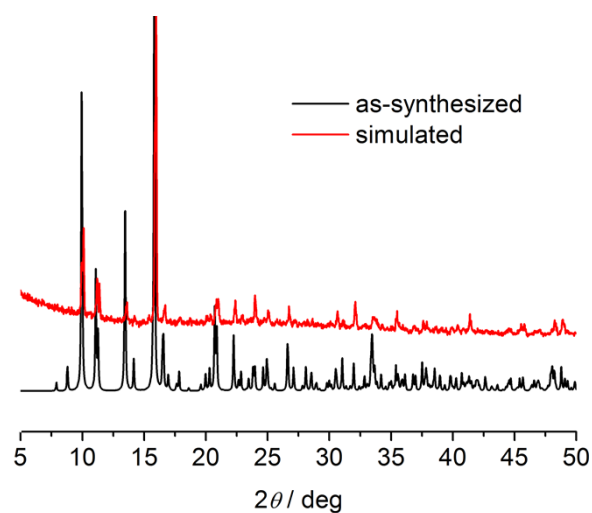

**Fig S4.** Comparison of XRPD patterns of the simulated pattern from the single-crystal structure determination and as-synthesized product of **2**.

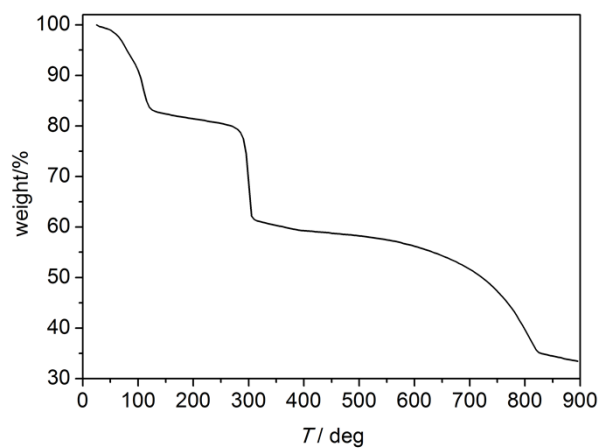

**Fig S5.** TG curve of complex **1**.

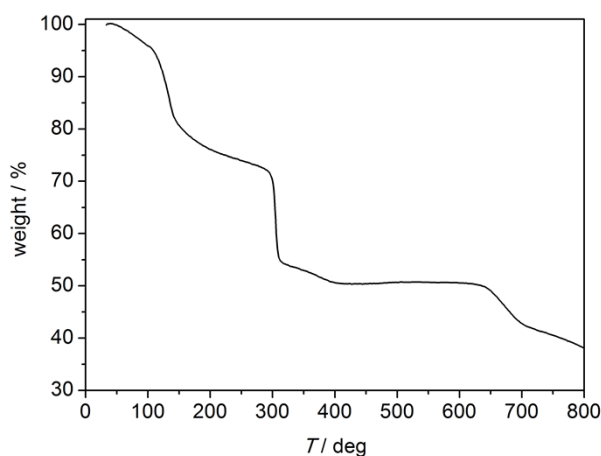

**Fig S6.** TG curve of complex **2**.

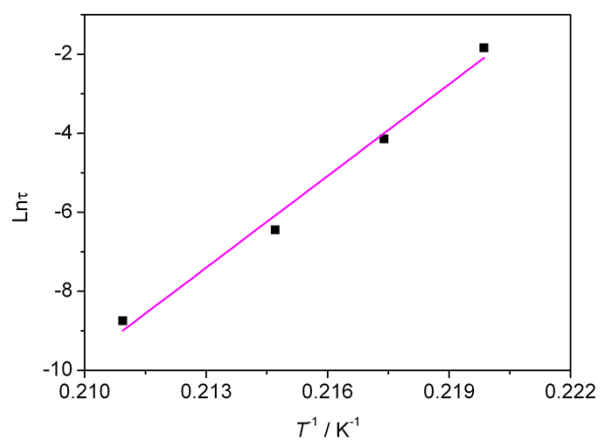

**Fig S7.** Plot of  $\ln\tau$  against  $1/T$  for **1**, the solid line is least-squares fits to the Arrhenius law.

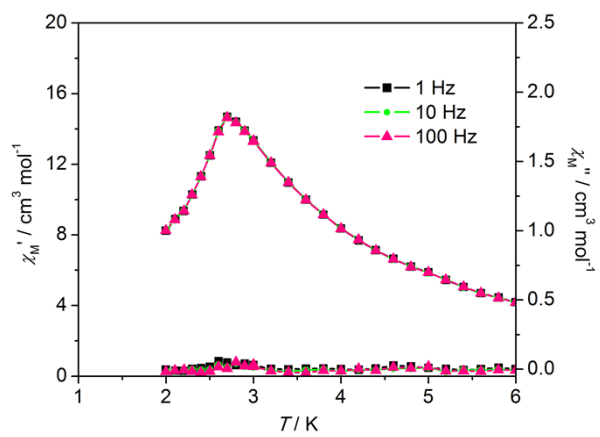

**Fig S8.** AC magnetic susceptibilities at 1,10,100 Hz of **2**.

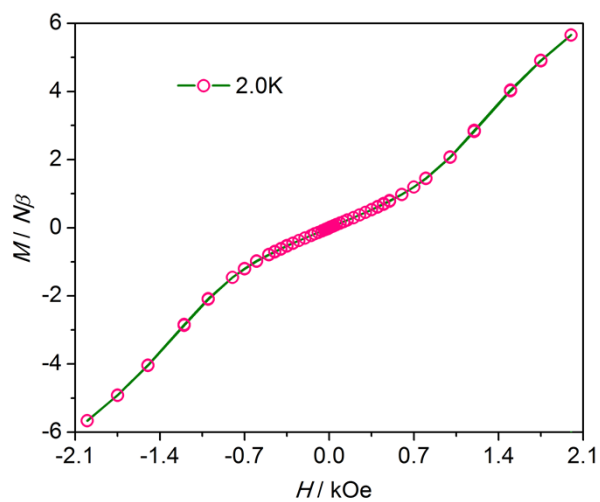

**Fig S9.** Magnetization  $M$  in  $N\beta$  units vs  $H$  plot for complex **2**.
